# Supplementary material
Source: Springer Nature journal article supplement (https://www.springermedizin.de/resource/supplementary/13069_2013_146_MOESM1_ESM.pdf/9659908)

A.

Trachea and main stem bronchi (cartilaginous airways)

Intralobar airways

Alveoli

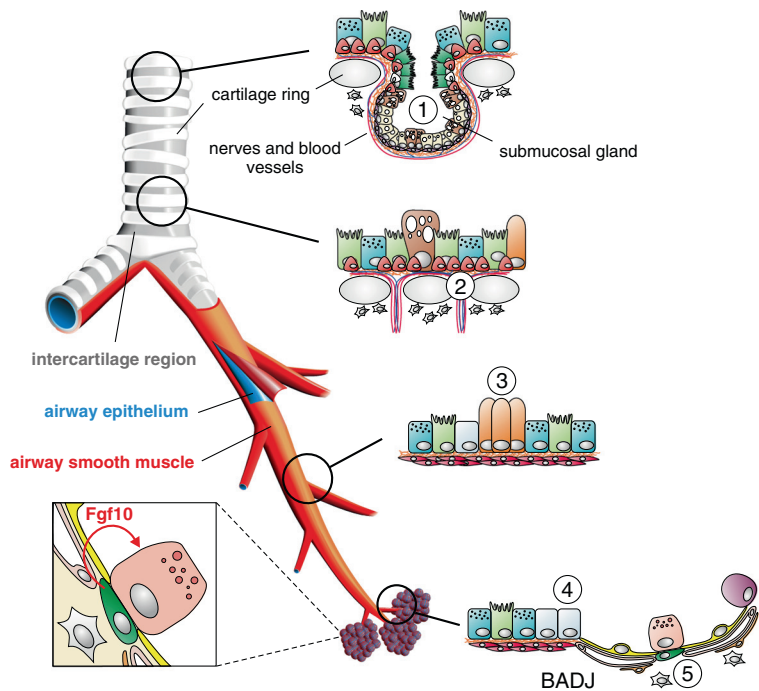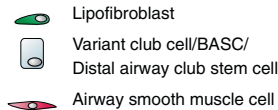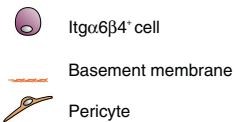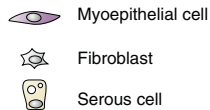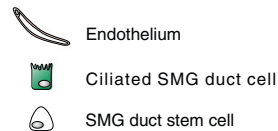

B.

Normal homeostasis

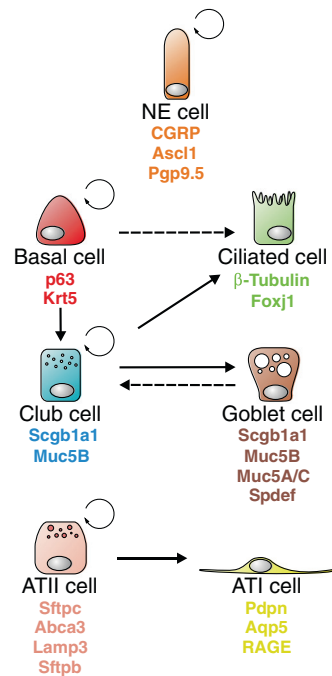

Supplement: MOESM1 [file 9659908]
